# Supplementary material for: A nonhuman primate model of inherited retinal disease
Source: J Clin Invest. 2019 Jan 22;129(2):863–74. doi: 10.1172/JCI123980 (PMC6355306; doi:10.1172/JCI123980)
Supplement: Supplemental data [file jci-129-123980-s291.pdf]

Supplemental Data

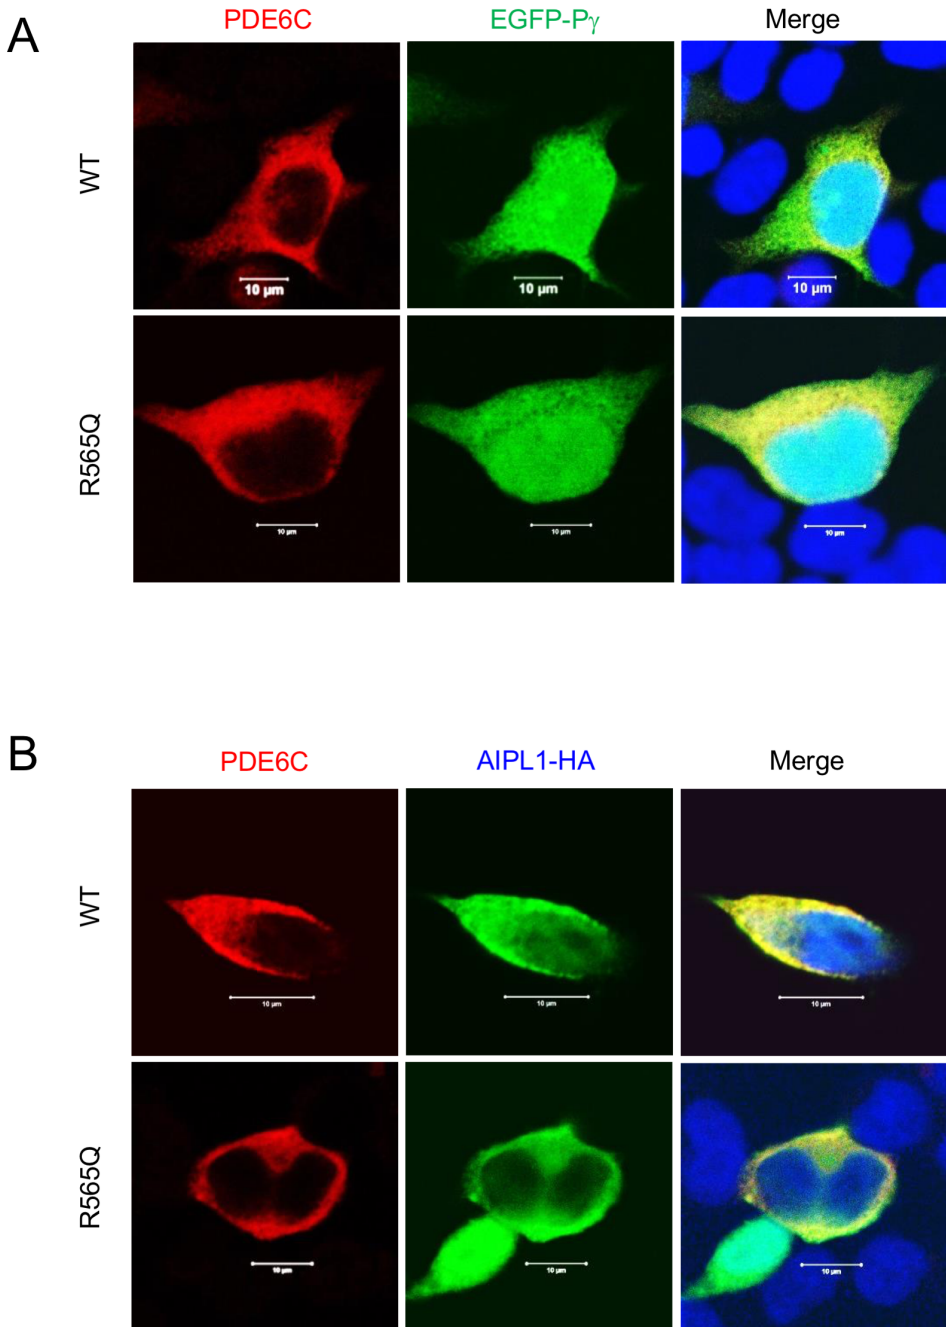

**Supplemental Figure 1. Subcellular distribution of PDE6C and its R565Q mutant co-expressed with P $\gamma$  or AIPL1 in HEK293T cells.**

Confocal immunofluorescence images of HEK293T cells (A) co-transfected with PDE6C or R565Q (red, anti-PDE6C) and EGFP-P $\gamma$  (green, EGFP fluorescence). (B), co-transfected with PDE6C (red, anti-PDE6C) and AIPL1 vector (AIPL1: green, anti-HA) Blue, TO-PRO3 nuclear stain. The findings suggest that the distributions of PDE6C and R565Q in HEK293T cells are qualitatively similar.

922

|                    |                                                                                 |                           |     |
|--------------------|---------------------------------------------------------------------------------|---------------------------|-----|
| PDE5AB_Zebrafish   | LEVLSYHASAAEEETRALQVTAATIPSAQSLRLMDYSFSD                                        | FDLTD AETTQATIRMFVDL      | 580 |
| PDE5_CHICK         | LEVLSYHASAAEEESRELQVTA AAVVPSAQS LNL TDFNFS                                     | DFELSD FETTLCTIRMFTDL     | 574 |
| PDE5A_MOUSE        | LEVLSYHASAAEEETRELQALSA AAVVPSAQT LKITDFS                                       | SDFELSDLETALCTIRMFTDL     | 572 |
| PDE5A_HUMAN        | LEVLSYHASAAEEETRELQSLAA AAVVPSAQT LKITDFS                                       | SDFELSDLETALCTIRMFTDL     | 582 |
| PDE5A_Green_Monkey | LEVLSYHASAAEEETRELQSLAA AAVVPSAQT LKITDFS                                       | SDFELSDLETALCTIRMFTDL     | 582 |
|                    | *****.* ** :*.:.****:*.:. *.:.****:*.:. *.:.****:*.:. *.:.****:*.:. *****       |                           |     |
| PDE5AB_Zebrafish   | KLVQNFQIKYKVP SLCQWILSVKKNYRKNVYHNW                                             | RHAFNTSQCMFAVLKSGRVQNNLSD | 640 |
| PDE5_CHICK         | NLVQNFQMKH--EVLCRWILSVKKNYRKNVAYHNW                                             | RHAFNTAQCMFAALKSGKIQSKLTD | 632 |
| PDE5A_MOUSE        | NLVQNFQMKH--EVLCRWILSVKKNYRKNVAYHNW                                             | RHAFNTAQCMFAALKAGKIQNKLTD | 630 |
| PDE5A_HUMAN        | NLVQNFQMKH--EVLCRWILSVKKNYRKNVAYHNW                                             | RHAFNTAQCMFAALKAGKIQNKLTD | 640 |
| PDE5A_Green_Monkey | NLVQNFQMKH--EVLCRWILSVKKNYRKNVAYHNW                                             | RHAFNTAQCMFAALKAGKIQNKLTD | 640 |
|                    | :*****.*: ** :*****.*****.*****.*****.*****.*****.*****.*****.*****.*****.***** |                           |     |

**Supplemental Figure 2. Amino acid sequence alignment shows the conservation of Aspartate (D) and Arginine (R) in the catalytic domain of PDE5 across several vertebrate species.**

**Supplemental File 1. The in silico analysis of the effect of the corresponding Human variant LRP5,c.G1694A;p.R565Q. Please see the table header for the meaning of each column. (downloadable Excel file)**
